# Supplementary material for: SNP-based genetic linkage map of tobacco (Nicotiana tabacum L.) using next-generation RAD sequencing
Source: PubMed Central journal article supplement (PMC4607152; doi:10.1186/s40709-015-0034-3), 2015-10-06

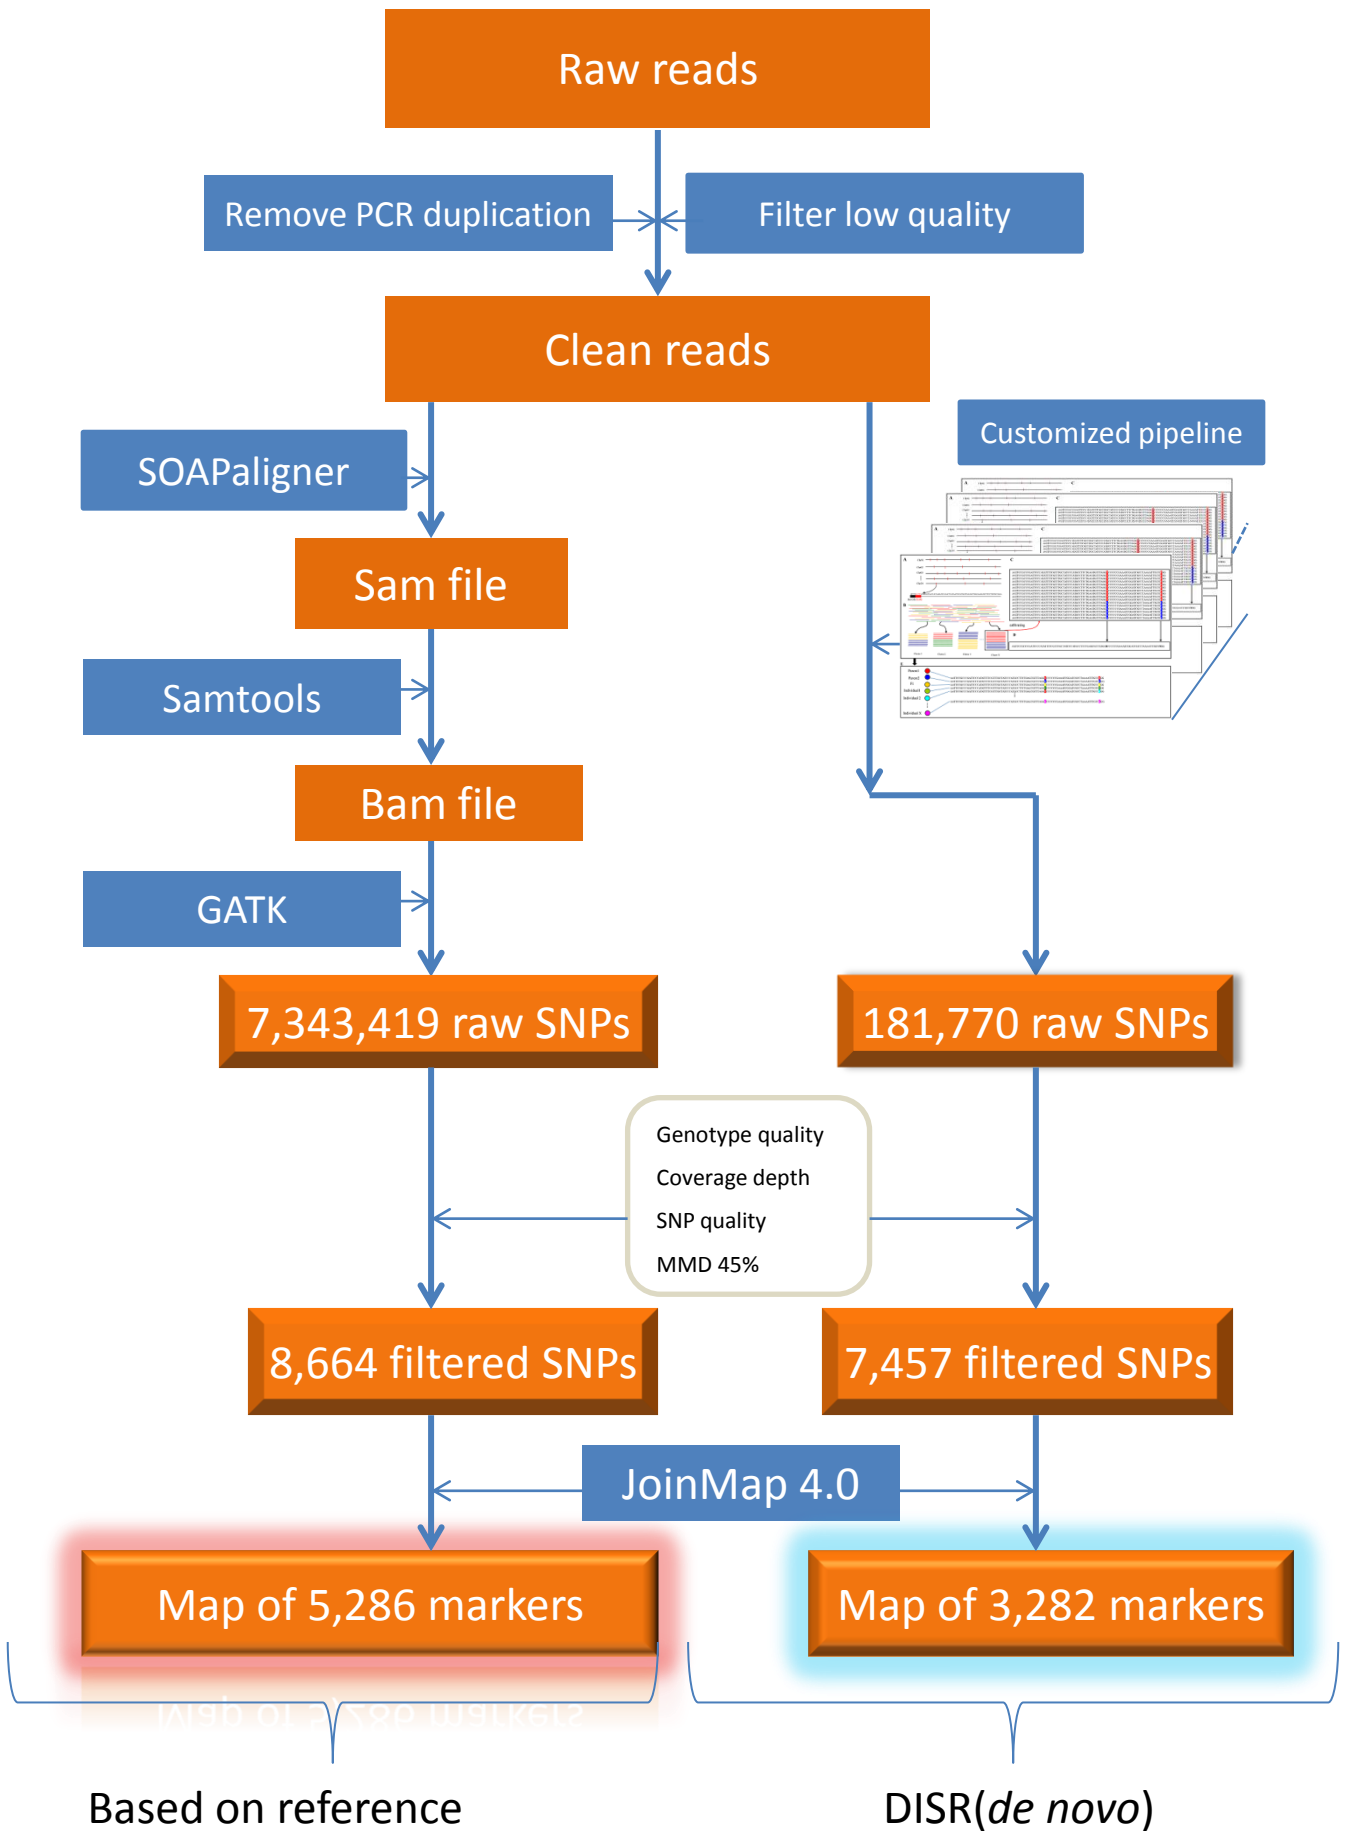

Supplement: 40709_2015_34_MOESM2_ESM.pdf [file 40709_2015_34_MOESM2_ESM.pdf]
